# Supplementary material for: Mutations in SLC45A2 Cause Plumage Color Variation in Chicken and Japanese Quail
Source: Oxford University Press journal article supplement (doi:10.1534/genetics.106.063107), 2006-12-07
Supplement: matp_supplement_table1.doc [file matp_supplement_table1.doc]

Supplementary Table 1. Primer sequences used for amplification of *SLC45A2* fragments in chicken and Japanese quail

| **Name** | **Primer sequences (5'-3')** | **Name** | **Primer sequences (5'-3')** |
| --- | --- | --- | --- |
| ex1Fpcr1,2 | ATATTCACCAGTGGCAGTTT | ex7Fseq1 | CTTCTCCATTCTGACTGCTTTATT |
| ex1Rpcr1,2 | GAGGCACCAGTCACAACTAC | ex7Rseq1 | GTAGGACATCAAGACACCACAGG |
| ex2Fpcr1,2 | CATGTGTCATGCTGATGAAT | up10kbF1 | ACTCACTGCTTGTGGAAAGA |
| ex2Rpcr1 | GTTTTGTGTGAGCTTTTTCC | up10kbR1 | CTCAAGCTGTGTGCTAATGA |
| ex3Fpcr1 | TCGTCTTCAGTCTCCTAAGC | up20kbF1 | AGAAACTCTCCCAAAGCAA |
| ex3Rpcr1 | GCCCCAGAAGTGATGTAGTA | up20kbR1 | AAATTTGGCCATAGTTAAGGT |
| ex3Rpcr31,2 | TGCGTGTGAAAGGACTCT | dwn9kbF1 | TCTGTAGGAAACCTGCCTTA |
| ex4&5Fpcr1,2 | AAGTATGTAGTGAAGGATGTTTAGC | dwn9kbR1 | TCAGCCTGGATCTGTAATTT |
| ex4&5Rpcr1,2 | GATTTTCAGTGCTTAGGGTCA | dwn20kbF1 | GAATCTCCTGCCCTAAGTTT |
| ex6Fpcr1 | GTTGACCCTAAGCACTGAAAATC | dwn20kbR1 | GTCTCCTCTTGGCCTTTTAT |
| ex6Rpcr1 | GAAATCATACAGAATAGCAGGACG | dwn30kbF1 | AAGCTTTGTCCCCTAATACC |
| ex6Fpcr32 | ACCGATTCACCCCTTCTA | dwn30kbR1 | AGAATTGTCATGGACCAAAG |
| ex6Rpcr32 | TCCCTGATGAAATGTTGC | dwn80kbF1 | TCCCTTGAGTCTTAGTTTGC |
| ex7Fpcr1 | GAAAAGTTGCTGGTGGGGG | dwn80kbR1 | CCTGCTCCATAAAGCTTAGA |
| ex7Rpcr1 | TGCTACATCCAGTTGCTTTGC | cDNAexon1F1 | GGGAGGGAGTTCTGCTAT |
| ex7Fpcr32 | CTAAAACCAGAAAGGAAGCA | cDNAexon7R1 | CCACATATCGAACACAGAAA |
| ex7Rpcr32 | CCTAGCGCTGTTCATTACTC | chRACE5’rev11 | CAAAGGCAGCCTCCACAGCATAGCA |
| ex7Fpcr52 | TCTGGCTCTTGTTTTGTGC | chRACE3’fwd11 | GGTGGCACTGATTGGCTGCTGCTTT |
| ex7Rpcr52 | AGCGTGGCAACAGCACCA | chRACE3’fwd21 | GAGCATGGGAGAGGAAAGGGCATTGA |
| ex1Fseq1 | CCCCTTCCTTCATAACTTGT | PYROex3Fseq1 | TGTTGGAAGTGACCGAGCC |
| ex1Rseq1 | TCACACAGCATTAGGATTGA | PYROex3Rbio1 | biotin-TGCATCAGTACCTTTCTTTGTCTTA |
| ex2Fseq1 | CCCACTTCTCAGATGTCAAT | PYROex4Fbio1 | biotin-CACTCTTGAAGACTCTTTTAAGCAT |
| ex2Rseq2 | TGATTACAAAATCCATGCAA | PYROex4Rseq1 | CGTGAAGAAGAGCATGTTGGAC |
| ex3Fseq2 | ATTTGCTGGAAAAGAGATGA | AlQex3cDNAfwd2 | AACTGTACTGGGATATTCCTTGA |
| ex3Rseq1 | ACAATAAGGCAGATGAGGAA | AlQex5cDNArev2 | GTGTGGAGTTATGAGAAGCGTA |
| ex4&5Fseq1 | GTACAACACACAGGTGATGAGGA | chSALtestF1 | CTGACTTGTCCGAGCACT |
| ex4&5Rseq1 | CACAACCTAAAGAGACCACAACA | chSALtestR21 | CATTGAGGTACAAAGCCATTCC |
| ex6Fseq1 | AGCAATCCCTGTTTCTTTCC |  |  |
| ex6Rseq1 | GCTGGGGGCTGTCATCTA |  |  |

1Primers used in chicken

2Primers used in Japanese quail
